# Supplementary material for: Generation of a carbon dots/ammonium persulfate redox initiator couple for free radical frontal polymerization
Source: Royal Society of Chemistry journal article supplement (doi:10.1039/c7py01969f), 2017-12-21
Supplement: c7py01969f1.pdf [file c7py01969f1.pdf]

## Supporting Information

### A generation of carbon dots/ammonium persulfate redox initiator couple for free radical frontal polymerization

Xiang-Yun Du, Juncal Shen, Jing Zhang, Luting Ling, Cai-Feng Wang and Su Chen\*

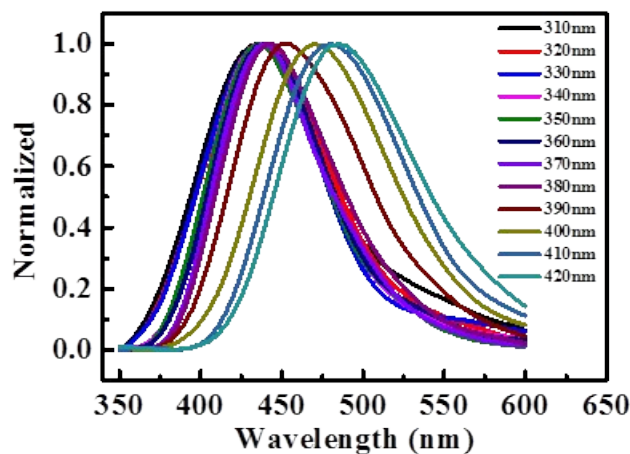

**Figure S1.** PL emission spectra of the CDs in aqueous solution with the excitation wavelength.

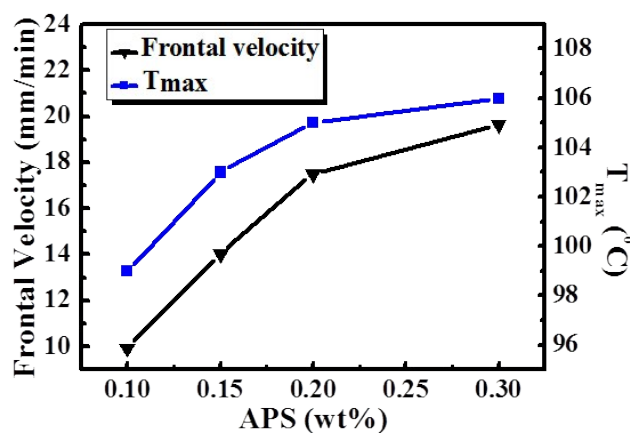

**Figure S2.** The frontal velocity and  $T_{\max}$  as a function of APS concentration for hydrogels at HEA/NVP = 8:2 wt/wt, glycerol = 50 wt%, MBAA = 0.25 wt%.

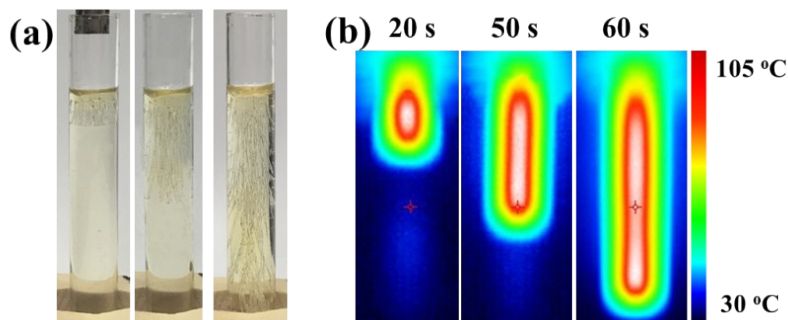

**Figure S3.** (a) Typical visual images and (b) sequence of thermos IR images of the polymerization process of the polymer gel at the CDs concentration of 0.15 wt%.

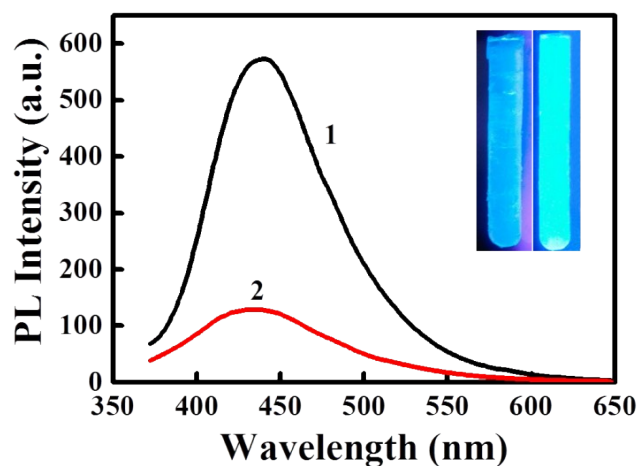

**Figure S4.** PL emission spectra (360 nm excitation) of (1) poly(HEA-co-NVP)/CDs hydrogel with the 0.1 wt% CDs and (2) poly(HEA-co-NVP) hydrogel at HEA/NVP = 8:2 wt/wt, glycerol = 50 wt%, MBAA = 0.25 wt%, APS = 0.2 wt%. (Insets: digital photographs of the corresponding hydrogels with (right) and without (left) the CDs under UV light.)

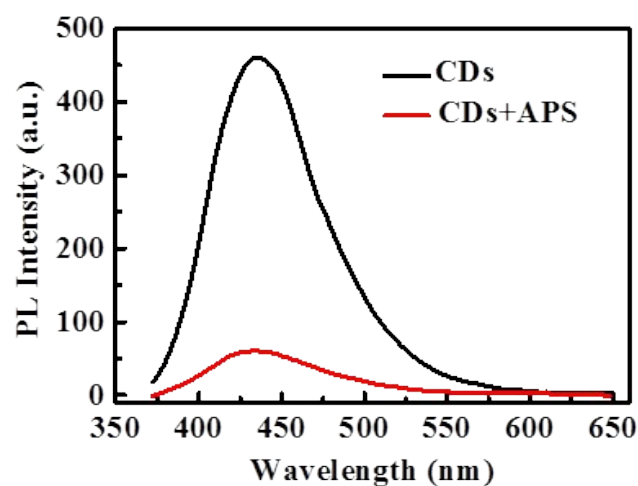

**Figure S5.** PL emission spectra (360 nm excitation) of the CDs in aqueous solution without and with APS.

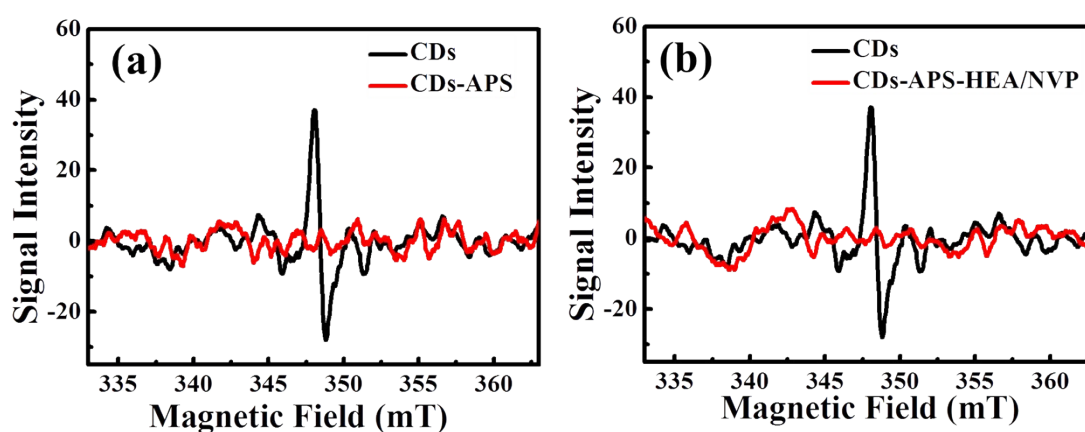

**Figure S6.** EPR spectra of the aqueous solutions of (a) the CDs with or without APS, and (b) the CDs with or without APS and monomers under visible light after heating for 1 h.

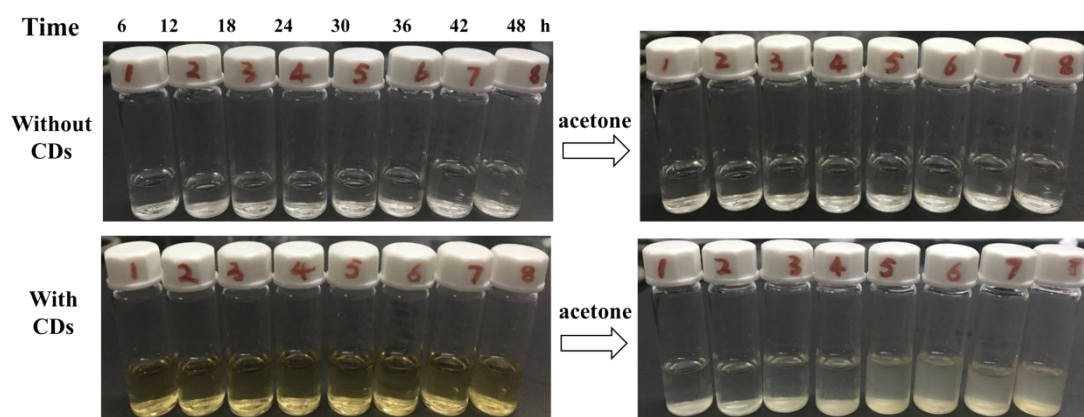

**Figure S7.** Photographs of the products for the solution polymerization with or without CDs at 80 °C and the corresponding precipitation solution used acetone as the precipitant. ( HEA/NVP = 4:1 wt/wt, H<sub>2</sub>O = 80 wt%)

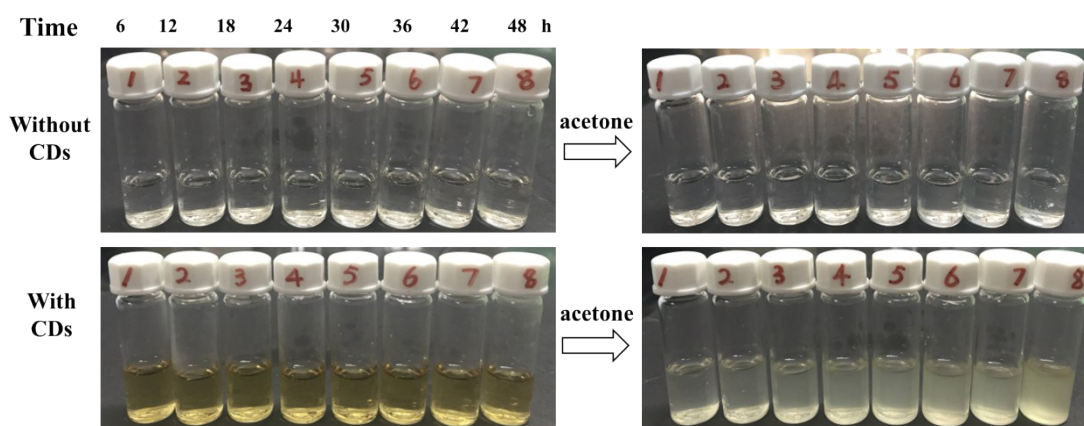

**Figure S8.** Photographs of the products for the solution polymerization with or without CDs at 90 °C and the corresponding precipitation solution used acetone as the precipitant. ( HEA/NVP = 4:1 wt/wt, H<sub>2</sub>O = 80 wt%)

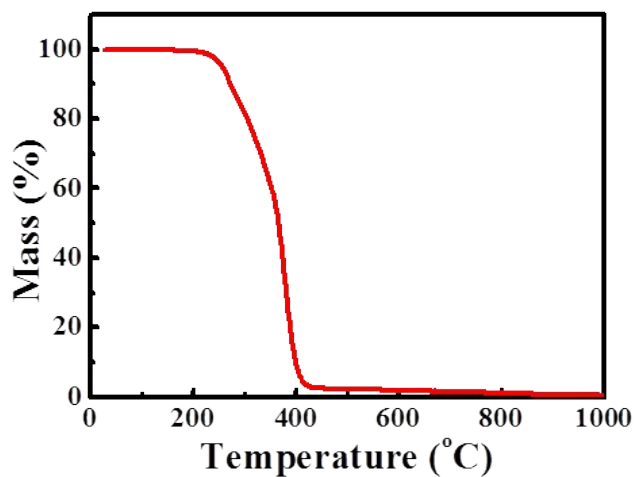

**Figure S9.** TGA curve of the products initiated by the CDs. ( HEA/NVP = 4:1 wt/wt, H<sub>2</sub>O = 80 wt%)

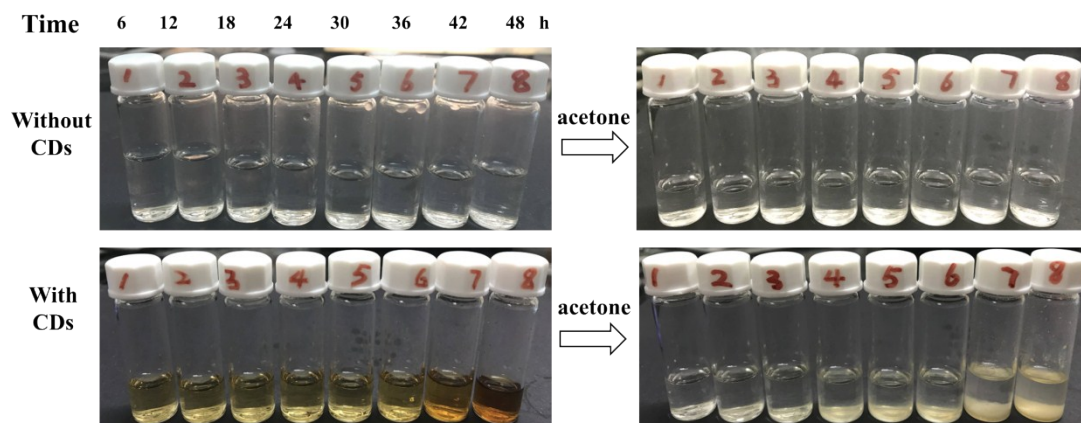

**Figure S10.** Photographs of the products for the solution polymerization with or without at 90 °C and the corresponding precipitation solution used acetone as the precipitant CDs. ( AA: DMC = 2:1 wt/wt, H<sub>2</sub>O = 80 wt%)

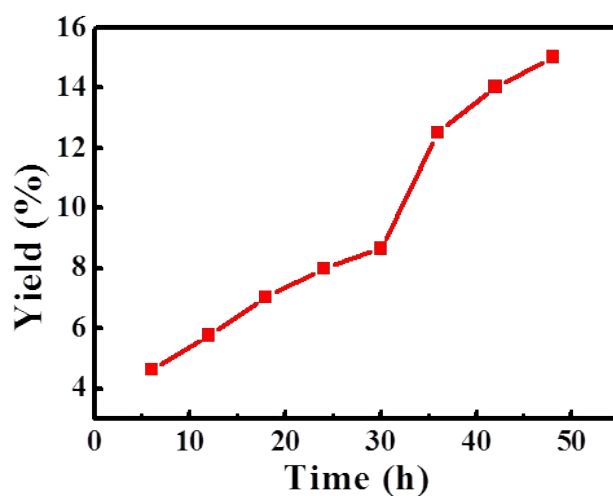

**Figure S11.** (a) Yields of polymers initiated by the CDs alone as a function of times with different reaction temperatures at HEA/NVP = 4:1 wt/wt, H<sub>2</sub>O = 80 wt%.

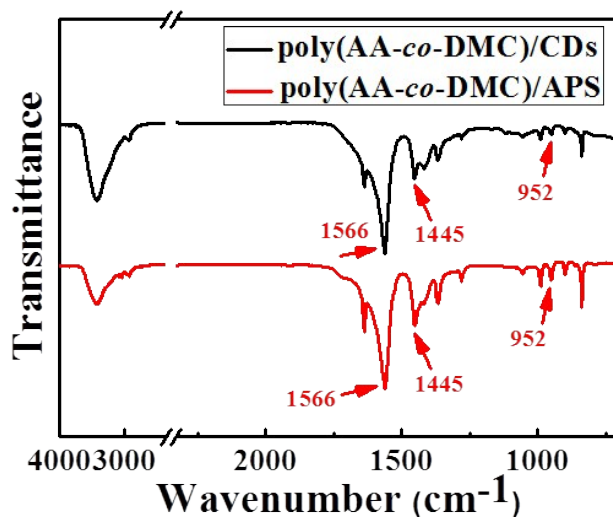

**Figure S12.** FT-IR spectra of copolymers of HEA and NVP initiated by the CDs or APS.( AA: DMC = 2:1 wt/wt, H<sub>2</sub>O = 80 wt%)

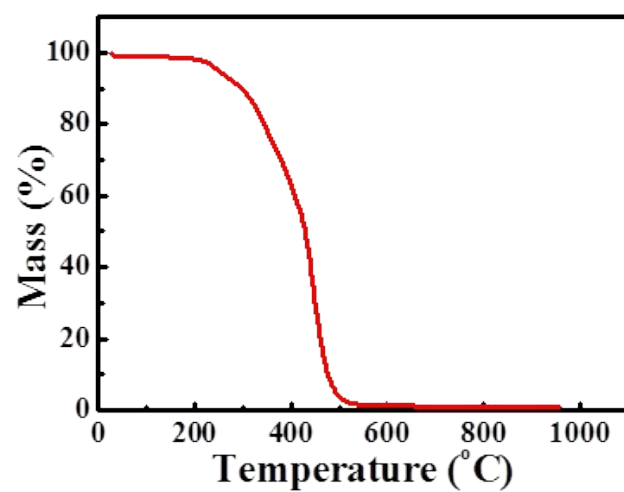

**Figure S13.** TGA curve of the products initiated by the CDs. (AA: DMC = 2:1 wt/wt, H<sub>2</sub>O = 80 wt%)
